# Supplementary material for: Neutral and cationic bismuth compounds supported by bis(amidodimethyl)disiloxane ligands
Source: Royal Society of Chemistry journal article supplement (doi:10.1039/c7dt00230k), 2017-01-01
Supplement: c7dt00230k1.pdf [file c7dt00230k1.pdf]

Supporting Information for:

# Neutral and Cationic Bismuth Compounds Supported by Bis(amidodimethyl)disiloxane Ligands

R. J. Schwamm, M. P. Coles, and C. M. Fitchett

## Contents

Page

|    |                                                                                                                                                                                                                                                                                                                                                                                             |
|----|---------------------------------------------------------------------------------------------------------------------------------------------------------------------------------------------------------------------------------------------------------------------------------------------------------------------------------------------------------------------------------------------|
| S2 | <b>Figure S1</b> $^1\text{H}$ NMR spectrum of $\text{Bi}(\text{NON}^{\text{Ar}'})\text{Cl}$ ( <b>1b</b> ).                                                                                                                                                                                                                                                                                  |
| S3 | <b>Figure S2</b> $^{13}\text{C}\{^1\text{H}\}$ NMR spectrum of $\text{Bi}(\text{NON}^{\text{Ar}'})\text{Cl}$ ( <b>1b</b> ).                                                                                                                                                                                                                                                                 |
| S4 | <b>Figure S3</b> $^1\text{H}$ NMR spectrum of $\{\text{Bi}(\text{NON}^{\text{Ar}'})\}_2(\mu\text{-NON}^{\text{Ar}'})$ ( <b>2b</b> ).                                                                                                                                                                                                                                                        |
| S5 | <b>Figure S4</b> $^{13}\text{C}\{^1\text{H}\}$ NMR spectrum of $\{\text{Bi}(\text{NON}^{\text{Ar}'})\}_2(\mu\text{-NON}^{\text{Ar}'})$ ( <b>2b</b> ).                                                                                                                                                                                                                                       |
| S6 | <b>Figure S5</b> Solid-state dimers of $[\mathbf{1b}]_2$ and $[\mathbf{1c}]_2$ .                                                                                                                                                                                                                                                                                                            |
| S7 | <b>Table S1</b> Crystal structure and refinement data for $\text{Bi}(\text{NON}^{\text{Ar}'})\text{Cl}$ ( <b>1b</b> ), $\{\text{Bi}(\text{NON}^{\text{Ar}'})\}_2(\mu\text{-NON}^{\text{Ar}'})$ ( <b>2b</b> ), $[\text{Bi}(\text{NON}^{\text{Ar}'})][\text{AlCl}_4]\cdot\text{C}_7\text{H}_8$ ( <b>3c</b> ) and $[\text{Bi}(\text{NON}^{\text{Ar}'})][\text{Ga}_2\text{Cl}_7]$ ( <b>4c</b> ) |

**Figure S1**  $^1\text{H}$  NMR spectrum (300 MHz,  $\text{C}_6\text{D}_6$ ) of  $\text{Bi}(\text{NON}^{\text{Ar}^1})\text{Cl}$  (**1b**)

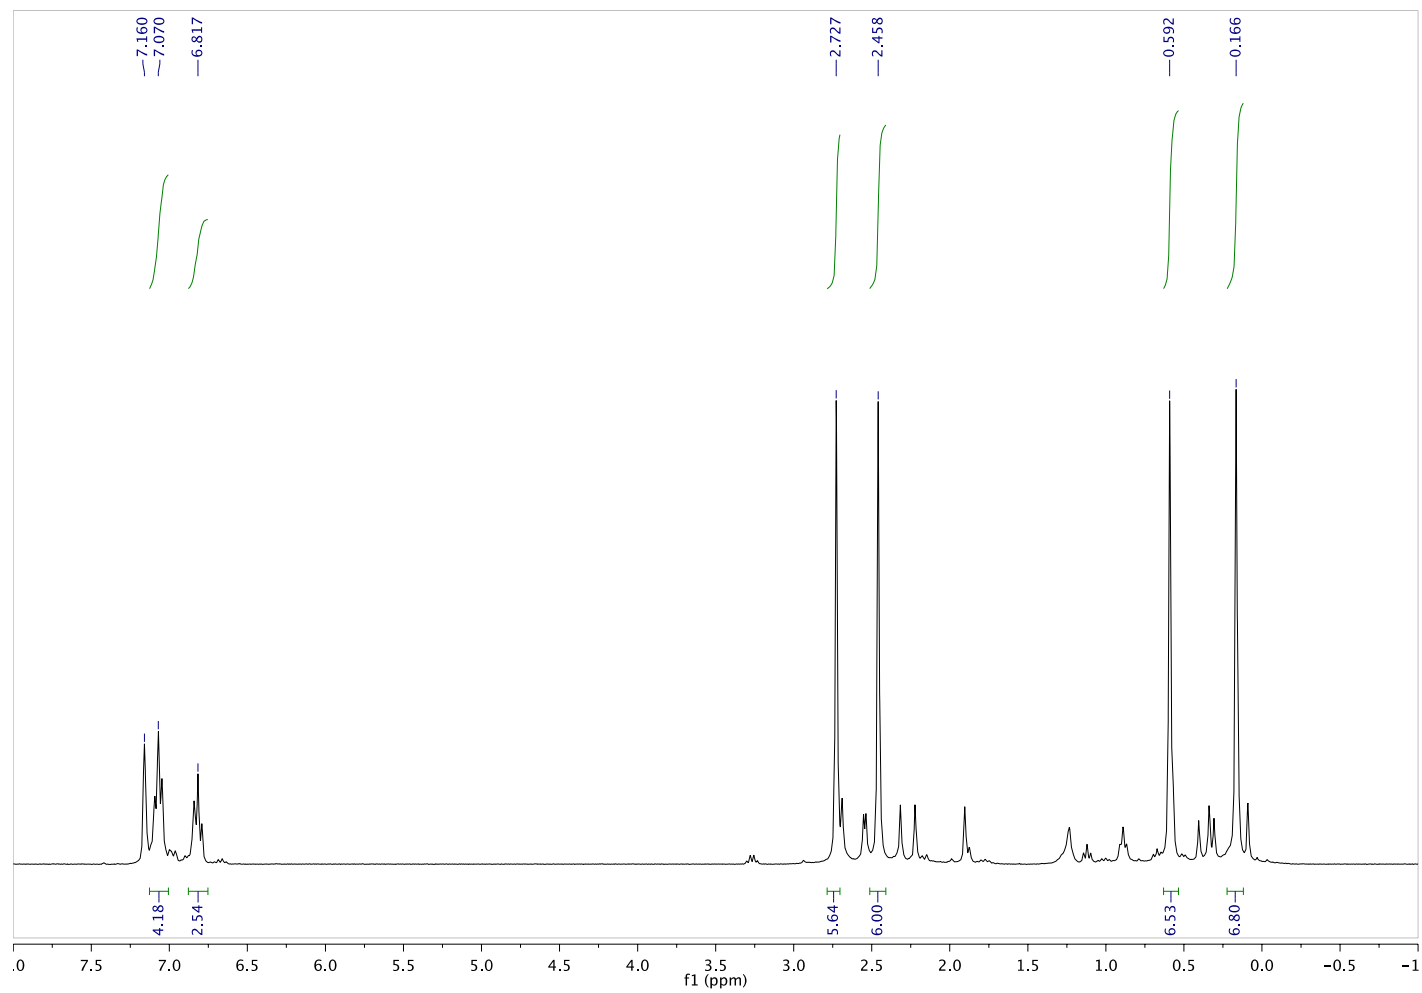

**Figure S2**  $^{13}\text{C}\{^1\text{H}\}$  NMR spectrum (75 MHz,  $\text{C}_6\text{D}_6$ ) of  $\text{Bi}(\text{NON}^{\text{Ar}'})\text{Cl}$  (**1b**)

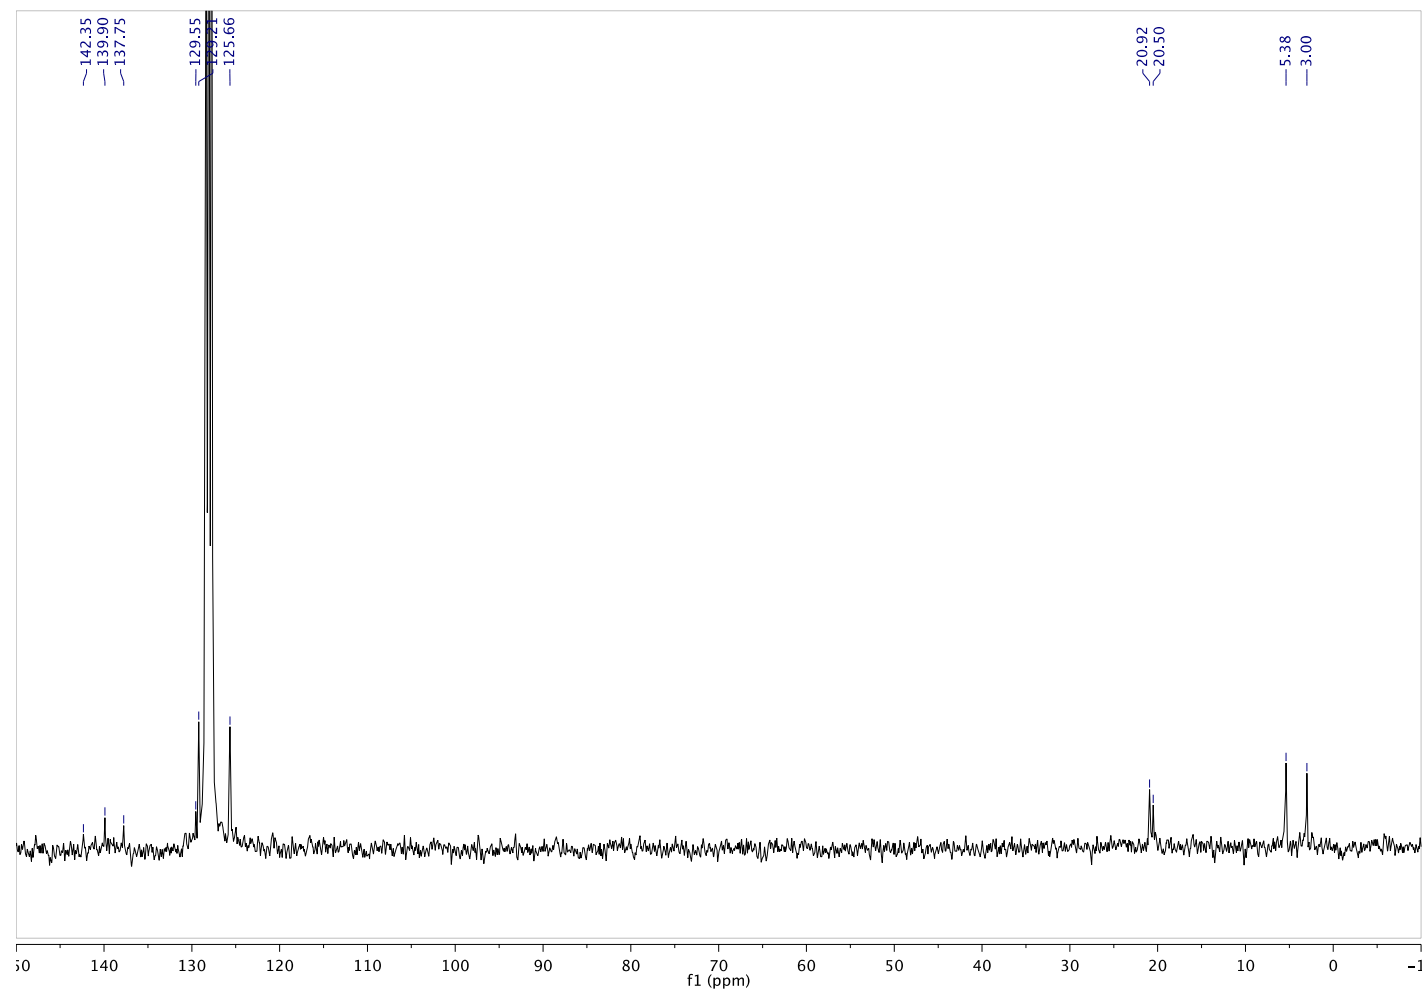

**Figure S3**  $^1\text{H}$  NMR spectrum (300 MHz,  $\text{C}_6\text{D}_6$ ) of  $\{\text{Bi}(\text{NON}^{\text{Ar}'})\}_2(\mu\text{-NON}^{\text{Ar}'})$  (**2b**)

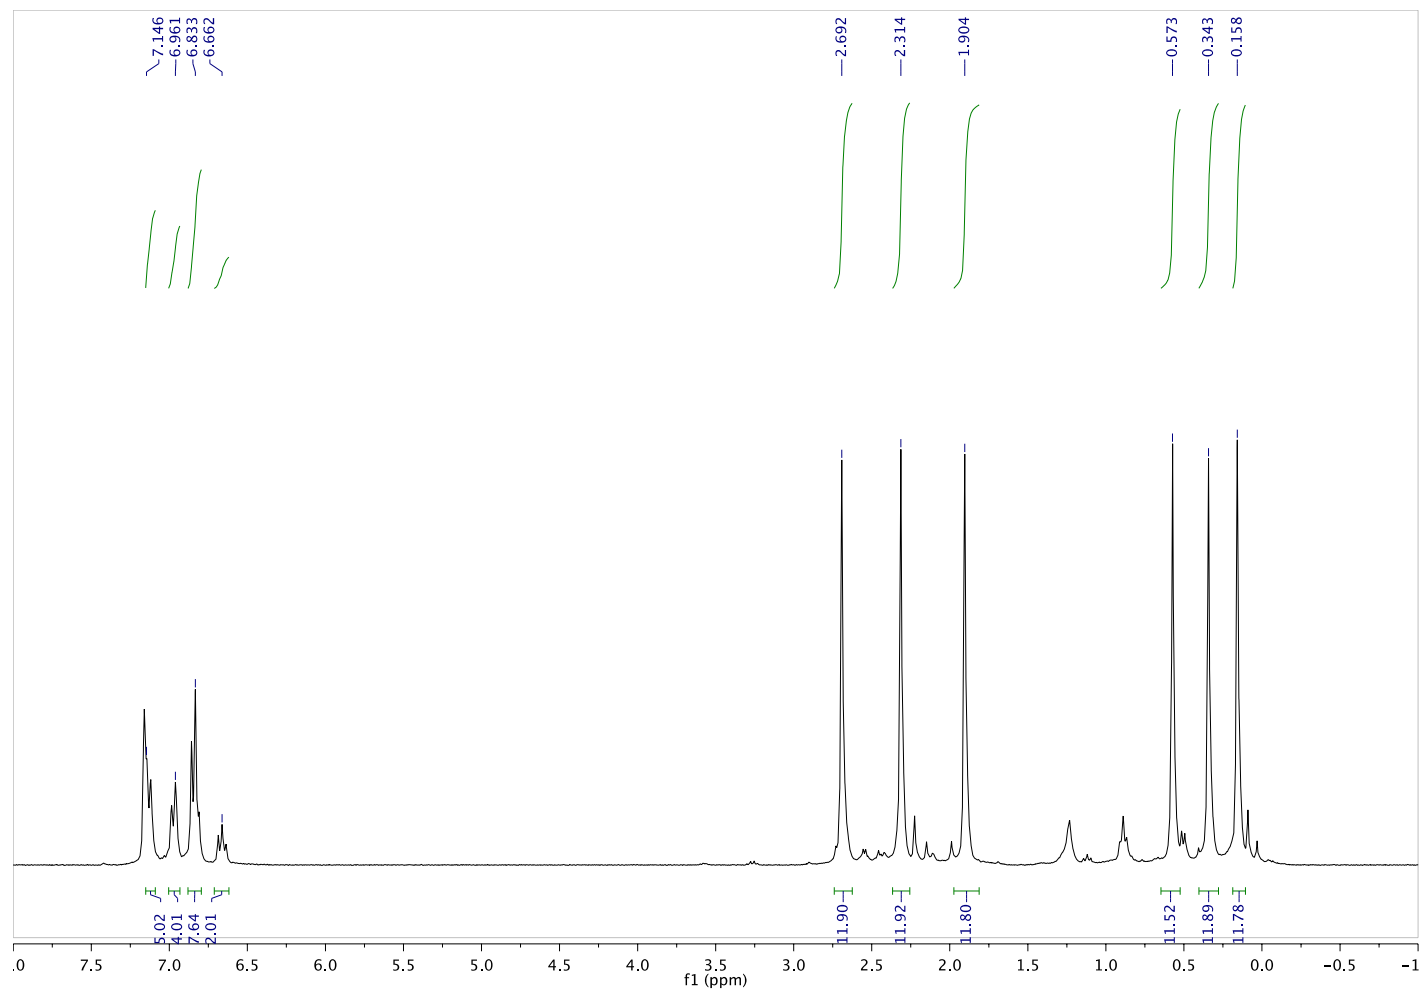

**Figure S4**  $^{13}\text{C}\{^1\text{H}\}$  NMR spectrum (75 MHz,  $\text{C}_6\text{D}_6$ ) of  $\{\text{Bi}(\text{NON}^{\text{Ar}'})\}_2(\mu\text{-NON}^{\text{Ar}'})$  (**2b**)

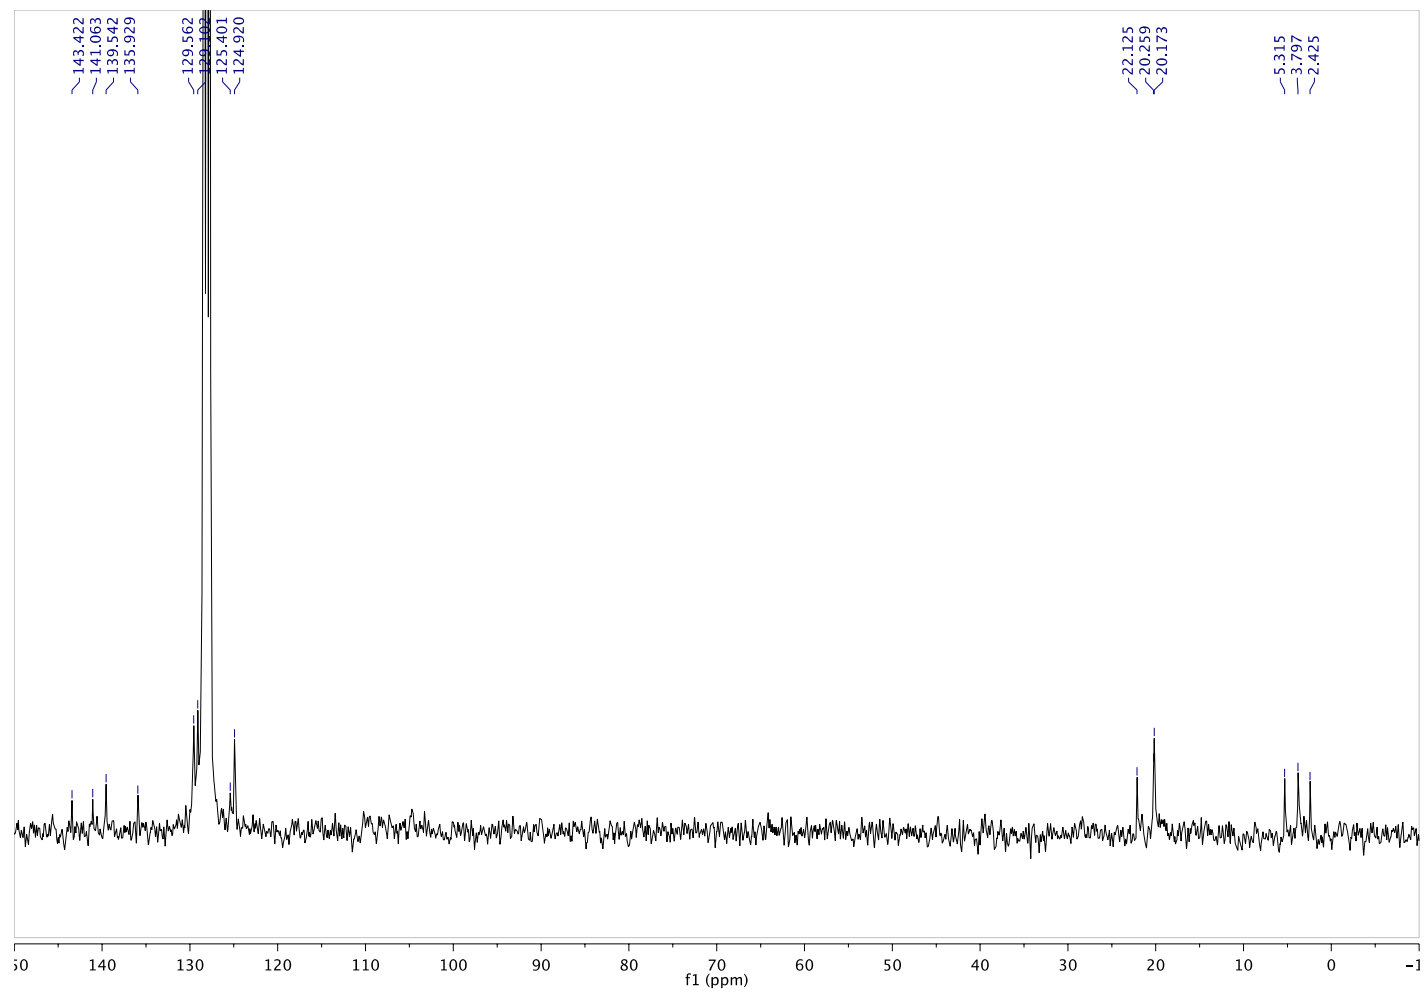

**Figure S5** Solid-state dimers of **[1b]<sub>2</sub>** (top) and **[1c]<sub>2</sub>** (bottom). (a)  $' = 2-x, 2-y, -z$ . Bi...C14' 3.673(6) Å; Bi...C15' 3.540(6) Å; Bi...C16' 3.489(5) Å; Bi...C17' 3.496(5) Å; Bi...C18' 3.634(6) Å. (b)  $' = 1-x, 1-y, 1-z$ . Bi...C19' 3.715(4) Å; Bi...C20' 3.753(4) Å.

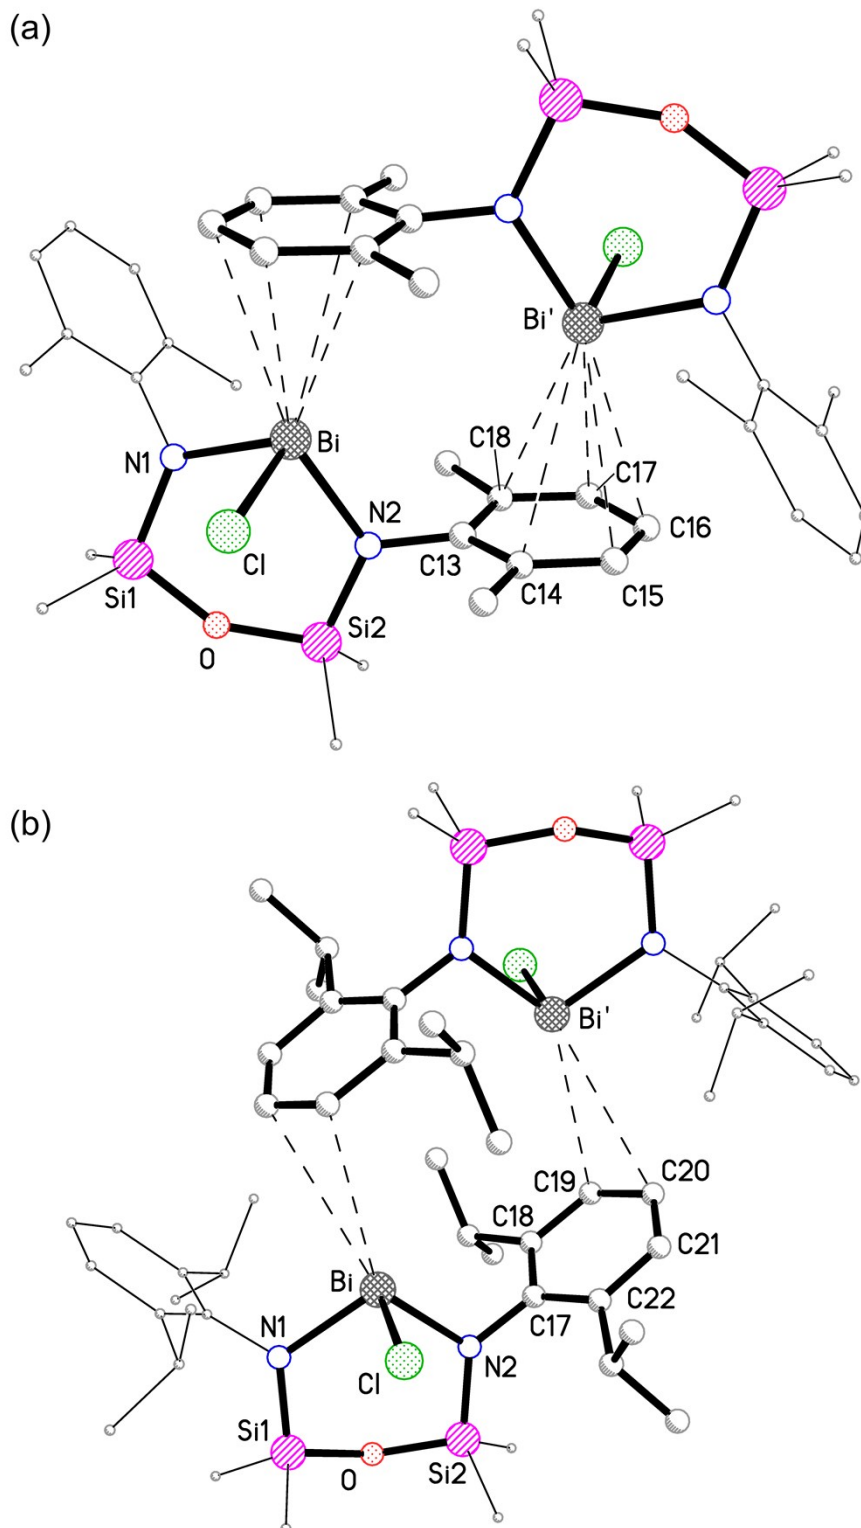

**Table S1** Crystal structure and refinement data for Bi(NON<sup>Ar'</sup>)Cl (**1b**), {Bi(NON<sup>Ar'</sup>)}<sub>2</sub>( $\mu$ -NON<sup>Ar'</sup>) (**2b**), [Bi(NON<sup>Ar'</sup>)][AlCl<sub>4</sub>] $\cdot$ C<sub>7</sub>H<sub>8</sub> (**3c**) and [Bi(NON<sup>Ar'</sup>)][Ga<sub>2</sub>Cl<sub>7</sub>] (**4c**)

|                                                              | <b>1b</b>                                                           | <b>2b</b>                                                                                     | <b>3c</b>                                                                           | <b>4c</b>                                                                                         |
|--------------------------------------------------------------|---------------------------------------------------------------------|-----------------------------------------------------------------------------------------------|-------------------------------------------------------------------------------------|---------------------------------------------------------------------------------------------------|
| CCDC number                                                  | 1528433                                                             | 1528434                                                                                       | 1528435                                                                             | 1528436                                                                                           |
| Empirical formula                                            | C <sub>20</sub> H <sub>30</sub> BiClN <sub>2</sub> OSi <sub>2</sub> | C <sub>60</sub> H <sub>90</sub> Bi <sub>2</sub> N <sub>6</sub> O <sub>3</sub> Si <sub>6</sub> | C <sub>35</sub> H <sub>54</sub> AlBiCl <sub>4</sub> N <sub>2</sub> OSi <sub>2</sub> | C <sub>28</sub> H <sub>46</sub> BiCl <sub>7</sub> Ga <sub>2</sub> N <sub>2</sub> OSi <sub>2</sub> |
| <i>M<sub>r</sub></i>                                         | 615.07                                                              | 1529.87                                                                                       | 952.74                                                                              | 1079.42                                                                                           |
| Radiation (wavelength [Å])                                   | MoK $\alpha$ ( $\lambda$ = 0.71073)                                 | CuK $\alpha$ ( $\lambda$ = 1.54184)                                                           | MoK $\alpha$ ( $\lambda$ = 0.71073)                                                 | MoK $\alpha$ ( $\lambda$ = 0.71073)                                                               |
| <i>T</i> [K]                                                 | 173(2)                                                              | 120.0(1)                                                                                      | 120.01(10)                                                                          | 120.0(1)                                                                                          |
| Crystal size [mm]                                            | 0.10 $\times$ 0.08 $\times$ 0.04                                    | 0.21 $\times$ 0.17 $\times$ 0.06                                                              | 0.46 $\times$ 0.31 $\times$ 0.22                                                    | 0.41 $\times$ 0.29 $\times$ 0.16                                                                  |
| Crystal system                                               | triclinic                                                           | triclinic                                                                                     | triclinic                                                                           | monoclinic                                                                                        |
| Space group                                                  | <i>P</i> $\bar{1}$ (No.2)                                           | <i>P</i> $\bar{1}$ (No.2)                                                                     | <i>P</i> $\bar{1}$ (No.2)                                                           | <i>P</i> 2 <sub>1</sub> / <i>c</i> (No.14)                                                        |
| <i>a</i> [Å]                                                 | 9.8884(3)                                                           | 11.7744(3)                                                                                    | 10.5351(2)                                                                          | 10.0533(2)                                                                                        |
| <i>b</i> [Å]                                                 | 10.6089(4)                                                          | 15.3339(4)                                                                                    | 10.8349(2)                                                                          | 10.2526(3)                                                                                        |
| <i>c</i> [Å]                                                 | 12.3277(5)                                                          | 19.9763(5)                                                                                    | 18.5054(3)                                                                          | 39.4446(10)                                                                                       |
| $\alpha$ [°]                                                 | 85.527(2)                                                           | 102.811(2)                                                                                    | 87.1030(13)                                                                         | 90                                                                                                |
| $\beta$ [°]                                                  | 76.827(2)                                                           | 90.9255(19)                                                                                   | 88.7719(13)                                                                         | 92.9450(19)                                                                                       |
| $\gamma$ [°]                                                 | 68.765(2)                                                           | 107.564(2)                                                                                    | 75.1549(15)                                                                         | 90                                                                                                |
| <i>V</i> [Å <sup>3</sup> ]                                   | 1173.70(7)                                                          | 3339.50(16)                                                                                   | 2039.14(6)                                                                          | 4060.27(16)                                                                                       |
| <i>Z</i>                                                     | 2                                                                   | 2                                                                                             | 2                                                                                   | 4                                                                                                 |
| <i>D</i> <sub>calc.</sub> [Mg m <sup>-3</sup> ]              | 1.74                                                                | 1.52                                                                                          | 1.55                                                                                | 1.77                                                                                              |
| Absorption coefficient [mm <sup>-1</sup> ]                   | 7.739                                                               | 11.608                                                                                        | 4.695                                                                               | 6.186                                                                                             |
| $\theta$ range for data collection [°]                       | 1.70 to 27.49                                                       | 3.11 to 69.99                                                                                 | 2.60 to 30.0                                                                        | 2.82 to 26.00                                                                                     |
| Reflections collected                                        | 17593                                                               | 38204                                                                                         | 73699                                                                               | 31043                                                                                             |
| Independent reflections ( <i>R</i> <sub>int</sub> )          | 5299 (0.054)                                                        | 12659 (0.039)                                                                                 | 11894 (0.028)                                                                       | 7987 (0.050)                                                                                      |
| Data/restraints/parameters                                   | 5299 / 0 / 248                                                      | 12659 / 0 / 718                                                                               | 11894 / 0 / 428                                                                     | 7987 / 12 / 400                                                                                   |
| Final <i>R</i> indices [ <i>I</i> > 2 $\sigma$ ( <i>I</i> )] | <i>R</i> <sub>1</sub> = 0.029, <i>wR</i> <sub>2</sub> = 0.062       | <i>R</i> <sub>1</sub> = 0.031, <i>wR</i> <sub>2</sub> = 0.080                                 | <i>R</i> <sub>1</sub> = 0.015, <i>wR</i> <sub>2</sub> = 0.038                       | <i>R</i> <sub>1</sub> = 0.060, <i>wR</i> <sub>2</sub> = 0.105                                     |
| Final <i>R</i> indices (all data)                            | <i>R</i> <sub>1</sub> = 0.040, <i>wR</i> <sub>2</sub> = 0.090       | <i>R</i> <sub>1</sub> = 0.031, <i>wR</i> <sub>2</sub> = 0.081                                 | <i>R</i> <sub>1</sub> = 0.016, <i>wR</i> <sub>2</sub> = 0.039                       | <i>R</i> <sub>1</sub> = 0.066, <i>wR</i> <sub>2</sub> = 0.106                                     |
| GOOF on <i>F</i> <sup>2</sup>                                | 1.466                                                               | 1.103                                                                                         | 1.134                                                                               | 1.367                                                                                             |
| Largest diff. peak/hole [e. $\cdot$ Å <sup>-3</sup> ]        | 0.93 and -2.79                                                      | 1.39 and -2.52                                                                                | 1.00 and -0.55                                                                      | 1.34 and -2.57                                                                                    |
